# Supplementary material for: Fluorescence anisotropic probe for sensing cardiac troponin-I antigen through target-specific antibody-conjugated gold nanoclusters
Source: Royal Society of Chemistry journal article supplement (doi:10.1039/d4ay01240b), 2024-01-01
Supplement: d4ay01240b1.pdf [file d4ay01240b1.pdf]

**Fluorescence anisotropic probe for sensing cardiac troponin-I antigen through  
Target-specific antibody-conjugated gold nanoclusters**

<sup>a</sup>S Madanan Anju, <sup>a</sup>Susan Varghese, <sup>a</sup>K Abraham Merin, <sup>a</sup>Ali Ibrahim Shkhair, Greeshma Rajeevan, Geneva Indongo, Arathy B.K and <sup>\*a</sup>Sony George

Corresponding author,

Dr. Sony George

Associate Professor, Department of Chemistry, School of Physical and Mathematical Science,  
University of Kerala, Thiruvananthapuram, Kerala, India- 695581

Mob: +919446462933

Email: emailtosony@gmail.com

<sup>a</sup> Department of Chemistry, School of Physical and Mathematical Science, University of Kerala, Thiruvananthapuram, Kerala, India- 695581

## Supporting documents

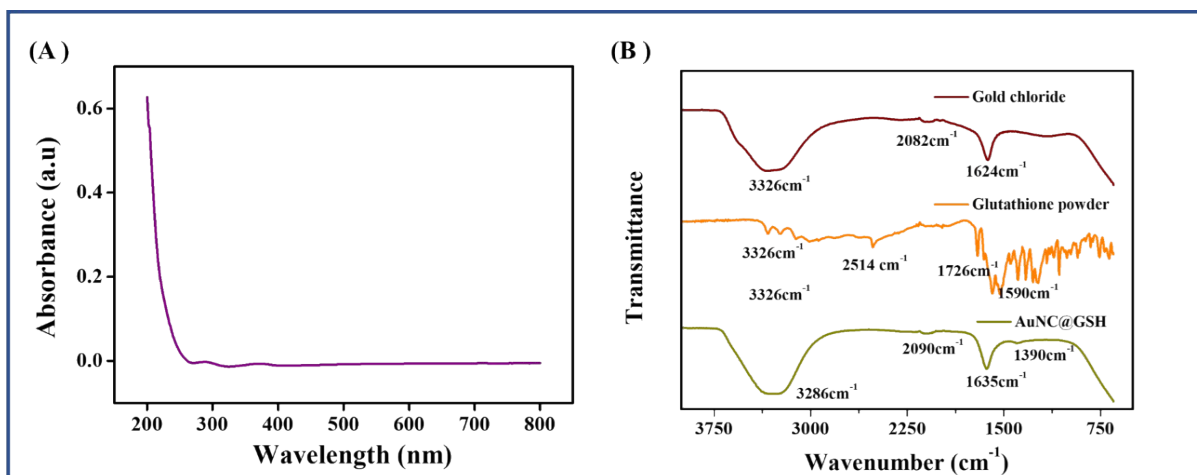

**Fig.S1.** (A) UV- Vis absorption spectrum of glutathione-capped gold nanoclusters (AuNC@GSH). (B) FTIR spectra of glutathione-capped gold nanoclusters and their precursors.

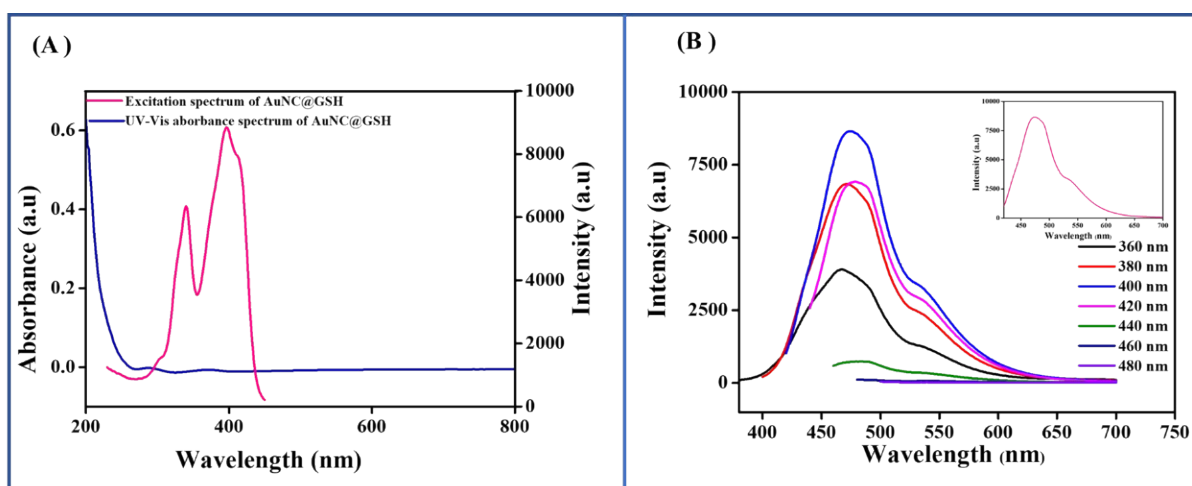

**Fig.S2.** (A) UV- Vis absorption spectrum and fluorescence excitation spectrum of glutathione-capped gold nanoclusters (AuNC@GSH) and (B) Fluorescence emission spectra of glutathione-capped gold nanoclusters with different excitation wavelengths ranging from 360 to 480nm, Fluorescence emission spectrum of AuNC@GSH at 400 nm excitation(inset).

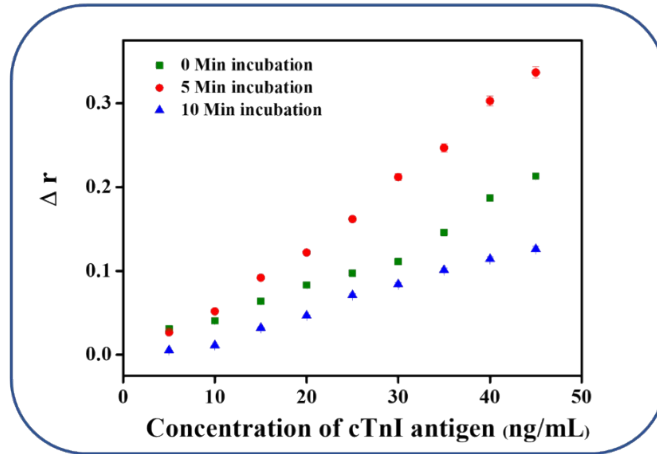

**Fig.S3.** Fluorescence anisotropy response ( $\Delta r$ ) of 0.05  $\mu\text{g/mL}$  cTnI specific monoclonal antibody conjugated glutathione capped gold nanoclusters (AbcTnI@AuNC@GSH) towards sequential addition of cTnI antigen (from 0 to 45ng/mL) at different incubation times.

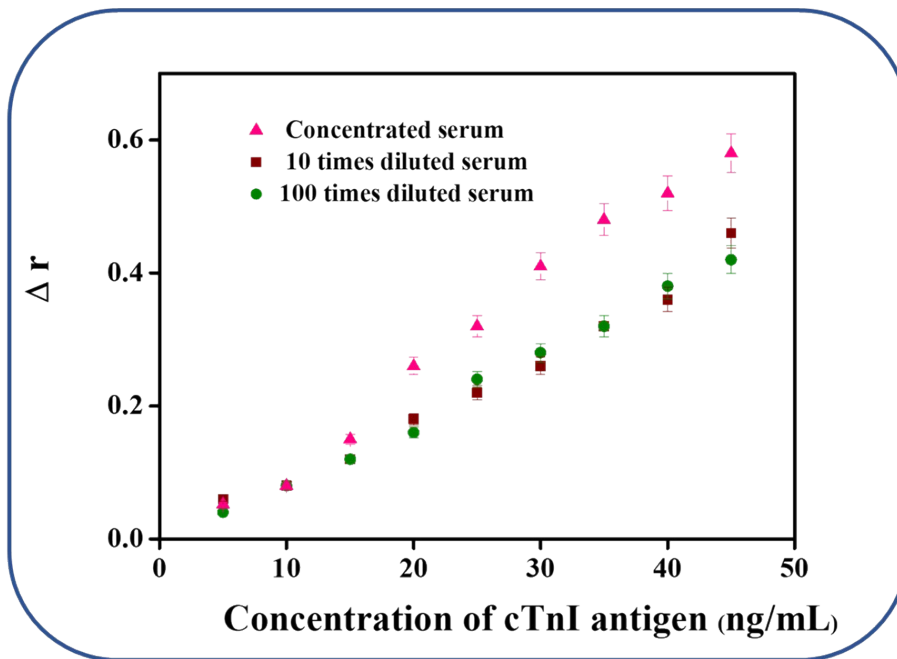

**Fig.S4.** Fluorescence anisotropy response of ( $\Delta r$ ) of 0.05  $\mu\text{g/mL}$  cTnI specific monoclonal antibody conjugated glutathione capped gold nanoclusters (AbcTnI@AuNC@GSH) towards sequential addition of cTnI antigen (from 0 to 45ng/mL) spiked serum and its diluted samples.

**Table S1:** Table of comparison of the analytical performance of the current FA method of detection of cTnI using antibody-conjugated gold nanoclusters with other previous reports.

| Sl. No. | Probe                                                | Method                   | LoD              | Reference |
|---------|------------------------------------------------------|--------------------------|------------------|-----------|
| 1.      | Fluorescent europium (III) chelate-dyed nanoparticle | Fluorescence             | 0.0020 $\mu$ g/L | [32]      |
| 2.      | ECL functionalized metal-organic framework           | Electrochemiluminescence | 0.48fg/mL        | [33]      |
| 3.      | Gold nanoparticle labelled antibody platform         | Fluorescence Anisotropy  | 0.50nM           | [34]      |
| 4.      | Carbon nanofiber nanoelectrode array                 | Electrochemical          | 0.20ng/mL        | [35]      |
| 5.      | Antibody-conjugated gold nanocluster                 | Fluorescence Anisotropy  | 0.91ng/mL        | This work |

**Table S2.** Table showing the recovery percentage of cTnI spiked serum sample with FA assay.

| Sl. No. | Sample id                     | Spiked Conc. (ng/mL) | Recovered Conc.(ng/mL) | Recovery percentage (%) |
|---------|-------------------------------|----------------------|------------------------|-------------------------|
| 1.      | Conc. Serum sample 1          | 2.70                 | 2.68                   | 99.25                   |
| 2.      | Conc. Serum sample 2          | 20.00                | 20.19                  | 100.91                  |
| 3.      | 10 Times dil. Serum sample 1  | 10.85                | 10.32                  | 94.90                   |
| 4.      | 10 Times dil. Serum sample 2  | 28.50                | 29.20                  | 102.45                  |
| 5.      | 100 Times dil. Serum sample 1 | 30.86                | 31.5                   | 102.07                  |
| 6.      | 100 Times dil. Serum sample 2 | 35.65                | 34.45                  | 96.63                   |
